# Supplementary material for: Goat sausages containing chitosan towards a healthier product: microbiological, physico-chemical textural evaluation
Source: Royal Society of Chemistry journal article supplement (doi:10.1039/c6fo00653a), 2016-01-01

## Supplementary material

Evaluation of lipid oxidation in fresh goat sausages prepared with different amounts of fat, 5%, 12.5% and 20% and with 2% of chitosan (samples F5C, F12.5C and F20C) and without chitosan (samples F5, F12.5 and F20) stored at 4 °C for 15 days. Different letters (a–b) differ significantly ( $p < 0.05$ ) in time. Different letters (A–B) differ significantly ( $p < 0.05$ ) in samples. A confidence interval of 95% ( $p < 0.05$ ) was considered in all cases.

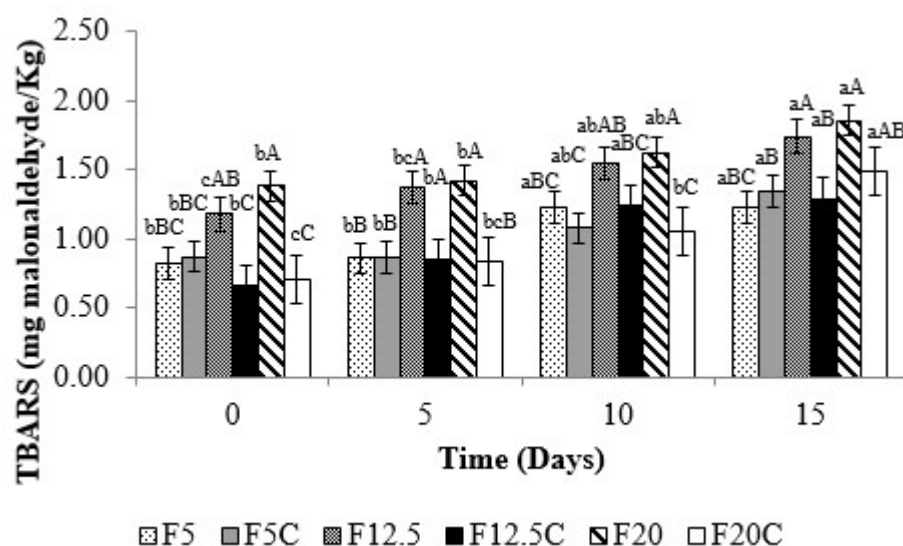

Supplement: c6fo00653a1.pdf [file c6fo00653a1.pdf]
